# Supplementary material for: Development of Strategy for SWAT Hydrologic Modeling in Data-Scarce Regions of Peru
Source: Atypon-hosted journal article supplement (doi:10.1061/(asce)he.1943-5584.0002086), 2021-05-12
Supplement: supplemental_materials_he.1943-5584.0002086_daneshvar.pdf [file supplemental_materials_he.1943-5584.0002086_daneshvar.pdf]

## SUPPLEMENTAL MATERIALS

*ASCE Journal of Hydrologic Engineering*

# Development of Strategy for SWAT Hydrologic Modeling in Data-Scarce Regions of Peru

Fariborz Daneshvar, Jane R. Frankenberger, Laura C. Bowling,  
Keith A. Cherkauer, and Andre G. de Lima Moraes

**DOI:** 10.1061/(ASCE)HE.1943-5584.0002086

© ASCE 2021

[www.ascelibrary.org](http://www.ascelibrary.org)

**Table S1.** Soil profiles used to estimate properties of soil classes in El Frayle watershed.

| Soil class name | Coverage<br>(% of watershed) | Associated profile(s)                             | Alternate profile(s) [Soil class] |
|-----------------|------------------------------|---------------------------------------------------|-----------------------------------|
| MM-P3sec        | 13.5                         | CA-14-Ancoyo                                      | -                                 |
| MM-P3s          | 12.4                         | S001                                              | -                                 |
| MM-P3swc        | 5.4                          | -                                                 | S001 [MM-P3s]                     |
| MM-P3se         | 2.9                          | CAL 23, CAL 42                                    | -                                 |
| SO-P2swc        | 17.0                         | -                                                 | CAL 14 [SO-P3se]                  |
| LL-Xsl          | 15.8                         | SC 12                                             | -                                 |
| CO-P2sec        | 7.2                          | M – 05, M – 06, M – 09                            | -                                 |
| CO-P3sec        | 3.6                          | M – 02, M – 03, M – 10,<br>M – 13, M – 14, M – 29 | -                                 |
| AC-P3sc         | 5.2                          | -                                                 | CAL 55, CAL 58 [AC-P3s]           |
| AC-P3s          | 2.8                          | CAL 55, CAL 58                                    | -                                 |
| PA-P3sw         | 3.8                          | -                                                 | CAL 53 [PA-P3s]                   |
| PA-P3swc        | 3.3                          | -                                                 | CAL 53 [PA-P3s]                   |

**Table S2.** Estimated SWAT soil properties for MM-P3s.

| Name [unit]                 | Value(s)   |        |            |
|-----------------------------|------------|--------|------------|
| NLAYERS                     | 3          |        |            |
| HYDGRP                      | B          |        |            |
| SOL_ZMX [mm]                | 250        |        |            |
| USLE K                      | 0.10       |        |            |
| SOL_ALB                     | 0.09       |        |            |
| TEXTURE                     | Loamy Sand | Sand   | Loamy Sand |
| SOL_Z [mm]                  | 250        | 800    | 1200       |
| SAND [%]                    | 86.0       | 92.0   | 84.0       |
| SILT [%]                    | 8.0        | 6.0    | 10.0       |
| CLAY [%]                    | 6.0        | 2.0    | 6.0        |
| SOL_CBN [%]                 | 0.46       | 0.23   | 0.29       |
| ROCK [%]                    | 27.5       | 27.5   | 27.5       |
| SOL_BD [g/cm <sup>3</sup> ] | 1.54       | 1.51   | 1.56       |
| SOL_AWC [mm/mm]             | 0.04       | 0.03   | 0.04       |
| SOL_K [mm/hr]               | 57.97      | 108.96 | 55.29      |

**Table S3.** Estimated SWAT soil properties for MM-P3sec.

| <b>Name [unit]</b>          | <b>Value(s)</b> |      |
|-----------------------------|-----------------|------|
| NLAYERS                     | 2               |      |
| HYDGRP                      | C               |      |
| SOL_ZMX [mm]                | 1100            |      |
| USLE_K                      | 0.16            |      |
| SOL_ALB                     | 0.13            |      |
| TEXTURE                     | Sandy<br>Clay   | Loam |
| SOL_Z [mm]                  | 500             | 1100 |
| SAND [%]                    | 52.0            | 48.0 |
| SILT [%]                    | 24.0            | 28.0 |
| CLAY [%]                    | 24.0            | 24.0 |
| SOL_CBN [%]                 | 0.17            | 0.17 |
| ROCK [%]                    | 27.5            | 27.5 |
| SOL_BD [g/cm <sup>3</sup> ] | 1.59            | 1.58 |
| SOL_AWC [mm/mm]             | 0.08            | 0.08 |
| SOL_K [mm/hr]               | 5.18            | 4.78 |

**Table S4.** Estimated SWAT soil properties for SO-P2swc.

| <b>Name [unit]</b>          | <b>Value(s)</b> |               |
|-----------------------------|-----------------|---------------|
| NLAYERS                     | 2               |               |
| HYDGRP                      | C               |               |
| SOL_ZMX [mm]                | 850             |               |
| USLE_K                      | 0.18            |               |
| SOL_ALB                     | 0.09            |               |
| TEXTURE                     | Sandy<br>Loam   | Sandy<br>Loam |
| SOL_Z [mm]                  | 550             | 850           |
| SAND [%]                    | 60.2            | 69.2          |
| SILT [%]                    | 31.2            | 21.0          |
| CLAY [%]                    | 8.6             | 9.6           |
| SOL_CBN [%]                 | 0.38            | 0.42          |
| ROCK [%]                    | 50.0            | 25.0          |
| SOL_BD [g/cm <sup>3</sup> ] | 1.59            | 1.58          |
| SOL_AWC [mm/mm]             | 0.06            | 0.07          |
| SOL_K [mm/hr]               | 20.51           | 34.29         |

**Table S5.** Estimated SWAT soil properties for LL-Xsl.

| <b>Name [unit]</b>          | <b>Value(s)</b> |               |               |
|-----------------------------|-----------------|---------------|---------------|
| NLAYERS                     | 3               |               |               |
| HYDGRP                      | C               |               |               |
| SOL_ZMX [mm]                | 0               |               |               |
| USLE_K                      | 0.16            |               |               |
| SOL_ALB                     | 0.30            |               |               |
| TEXTURE                     | Sandy<br>Loam   | Loamy<br>Sand | Loamy<br>Sand |
| SOL_Z [mm]                  | 100             | 600           | 800           |
| SAND [%]                    | 74.0            | 86.0          | 86.0          |
| SILT [%]                    | 18.0            | 10.0          | 10.0          |
| CLAY [%]                    | 8.0             | 4.0           | 4.0           |
| SOL_CBN [%]                 | 0.46            | 0.17          | 0.17          |
| ROCK [%]                    | 60.0            | 60.0          | 60.0          |
| SOL_BD [g/cm <sup>3</sup> ] | 1.57            | 1.55          | 1.55          |
| SOL_AWC [mm/mm]             | 0.04            | 0.03          | 0.03          |
| SOL_K [mm/hr]               | 25.51           | 47.92         | 47.92         |

**Table S6.** Estimated SWAT soil properties for CO-P2sec.

| <b>Name [unit]</b>          | <b>Value(s)</b> |       |               |               |               |       |               |
|-----------------------------|-----------------|-------|---------------|---------------|---------------|-------|---------------|
| NLAYERS                     | 7               |       |               |               |               |       |               |
| HYDGRP                      | C               |       |               |               |               |       |               |
| SOL_ZMX [mm]                | 450             |       |               |               |               |       |               |
| USLE_K                      | 0.19            |       |               |               |               |       |               |
| SOL_ALB                     | 0.18            |       |               |               |               |       |               |
| TEXTURE                     | Sandy<br>Loam   | Loam  | Sandy<br>Loam | Sandy<br>Loam | Sandy<br>Loam | Loam  | Sandy<br>Loam |
| SOL_Z [mm]                  | 100             | 150   | 300           | 400           | 450           | 750   | 1000          |
| SAND [%]                    | 53.3            | 48.0  | 52.7          | 60.0          | 56.0          | 51.0  | 52.0          |
| SILT [%]                    | 40.0            | 37.3  | 33.3          | 32.0          | 29.0          | 32.0  | 30.0          |
| CLAY [%]                    | 6.7             | 14.7  | 14.0          | 8.0           | 15.0          | 17.0  | 18.0          |
| SOL_CBN [%]                 | 1.85            | 1.54  | 1.14          | 0.87          | 0.57          | 0.50  | 0.62          |
| ROCK [%]                    | 10.3            | 10.3  | 10.3          | 13.7          | 13.7          | 13.7  | 27.5          |
| SOL_BD [g/cm <sup>3</sup> ] | 1.37            | 1.44  | 1.49          | 1.53          | 1.57          | 1.57  | 1.55          |
| SOL_AWC [mm/mm]             | 0.13            | 0.12  | 0.11          | 0.10          | 0.10          | 0.10  | 0.09          |
| SOL_K [mm/hr]               | 54.05           | 24.05 | 25.19         | 41.84         | 19.64         | 14.69 | 12.15         |

**Table S7.** Estimated SWAT soil properties for CO-P3sec.

| <b>Name [unit]</b>          | <b>Value(s)</b> |               |               |               |               |
|-----------------------------|-----------------|---------------|---------------|---------------|---------------|
| NLAYERS                     | 5               |               |               |               |               |
| HYDGRP                      | C               |               |               |               |               |
| SOL_ZMX [mm]                | 350             |               |               |               |               |
| USLE_K                      | 0.18            |               |               |               |               |
| SOL_ALB                     | 0.15            |               |               |               |               |
| TEXTURE                     | Sandy<br>Loam   | Sandy<br>Loam | Sandy<br>Loam | Sandy<br>Loam | Sandy<br>Loam |
| SOL_Z [mm]                  | 50              | 100           | 150           | 350           | 1200          |
| SAND [%]                    | 67.3            | 67.3          | 66.4          | 64.8          | 56.0          |
| SILT [%]                    | 28.3            | 28.3          | 29.2          | 28.8          | 30.0          |
| CLAY [%]                    | 4.3             | 4.3           | 4.4           | 6.4           | 14.0          |
| SOL_CBN [%]                 | 3.34            | 2.06          | 1.60          | 0.75          | 0.61          |
| ROCK [%]                    | 23.1            | 23.1          | 25.7          | 25.7          | 31.2          |
| SOL_BD [g/cm <sup>3</sup> ] | 1.37            | 1.46          | 1.50          | 1.57          | 1.59          |
| SOL_AWC [mm/mm]             | 0.09            | 0.08          | 0.08          | 0.08          | 0.08          |
| SOL_K [mm/hr]               | 75.21           | 66.85         | 60.49         | 44.61         | 16.38         |

**Table S8.** Estimated SWAT soil properties for AC-P3s.

| <b>Name [unit]</b>          | <b>Value(s)</b> |               |
|-----------------------------|-----------------|---------------|
| NLAYERS                     | 2               |               |
| HYDGRP                      | C               |               |
| SOL_ZMX [mm]                | 220             |               |
| USLE_K                      | 0.18            |               |
| SOL_ALB                     | 0.20            |               |
| TEXTURE                     | Sandy<br>Loam   | Sandy<br>Loam |
| SOL_Z [mm]                  | 220             | 320           |
| SAND [%]                    | 52.8            | 52.8          |
| SILT [%]                    | 36.6            | 28.6          |
| CLAY [%]                    | 10.6            | 18.6          |
| SOL_CBN [%]                 | 1.37            | 0.12          |
| ROCK [%]                    | 45.0            | 50.0          |
| SOL_BD [g/cm <sup>3</sup> ] | 1.46            | 1.61          |
| SOL_AWC [mm/mm]             | 0.09            | 0.07          |
| SOL_K [mm/hr]               | 22.34           | 6.70          |

**Table S9.** Estimated SWAT soil properties for PA-P3sw.

| <b>Name [unit]</b>          | <b>Value(s)</b> |
|-----------------------------|-----------------|
| NLAYERS                     | 1               |
| HYDGRP                      | C               |
| SOL_ZMX [mm]                | 250             |
| USLE_K                      | 0.18            |
| SOL_ALB                     | 0.09            |
| TEXTURE                     | Loam            |
| SOL_Z [mm]                  | 250             |
| SAND [%]                    | 48.4            |
| SILT [%]                    | 38.0            |
| CLAY [%]                    | 13.6            |
| SOL_CBN [%]                 | 0.12            |
| ROCK [%]                    | 30.0            |
| SOL_BD [g/cm <sup>3</sup> ] | 1.62            |
| SOL_AWC [mm/mm]             | 0.10            |
| SOL_K [mm/hr]               | 12.47           |

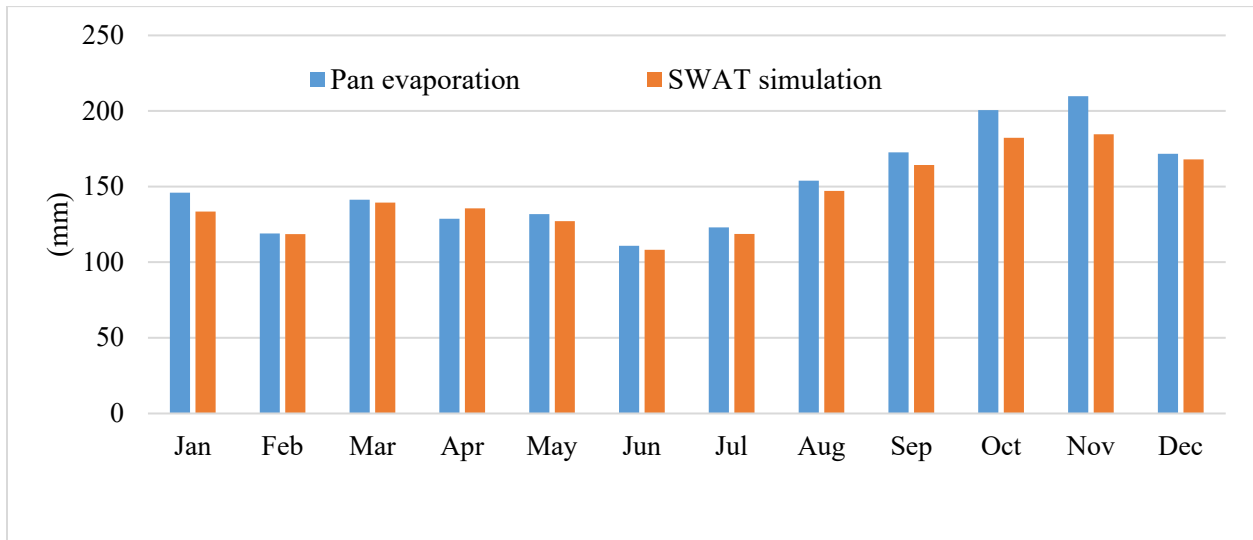

**Fig. S1.** Comparison of monthly averaged reservoir evaporation from 2010-2017.

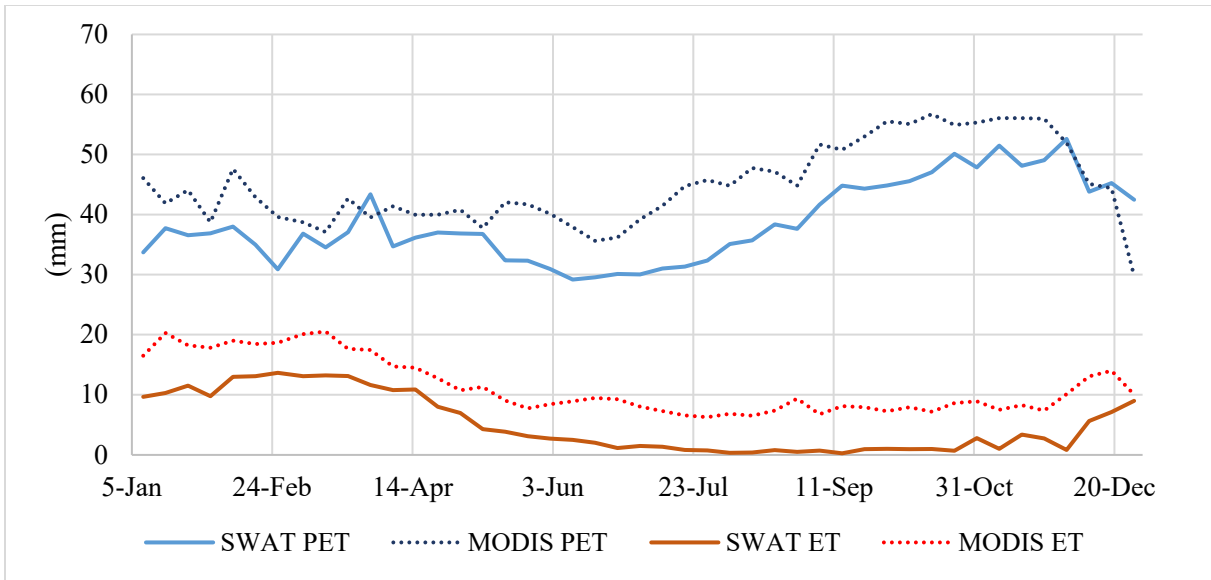

**Fig. S2.** Simulated and observed (by MODIS) eight-day average PET and ET for a subbasin covered by pajonal (bushes of tall grasses and hard leaves) at 4200 m elevation (2010-2017).

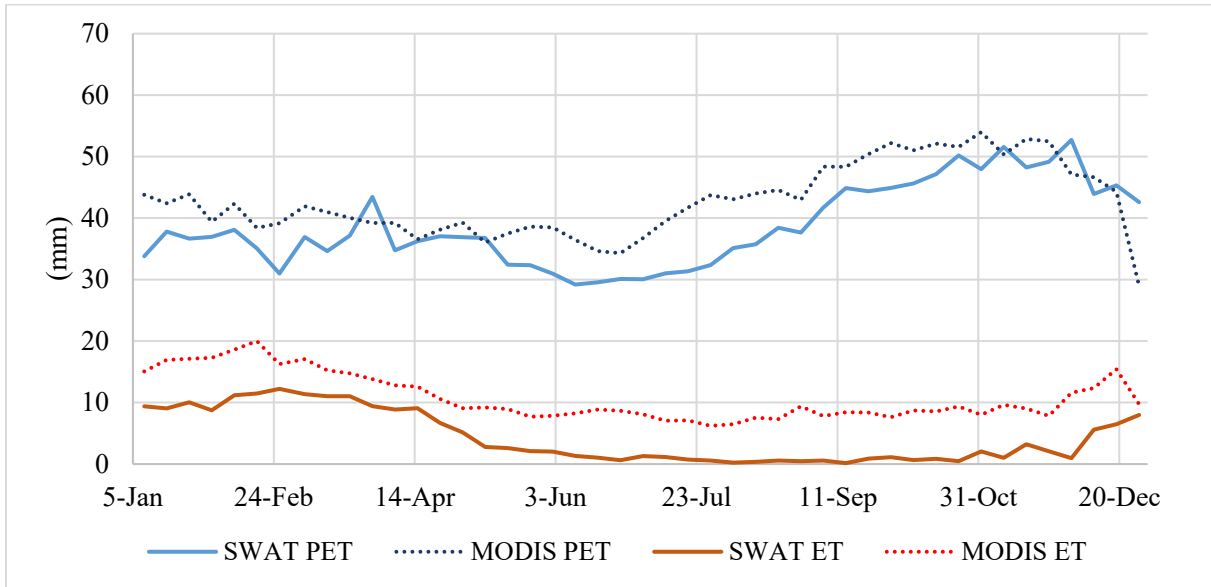

**Fig. S3.** Simulated and observed (by MODIS) eight-day average PET and ET for a subbasin covered by tolares (open herbaceous with a mixture of woody plants) at 4200 m elevation (2010-2017).

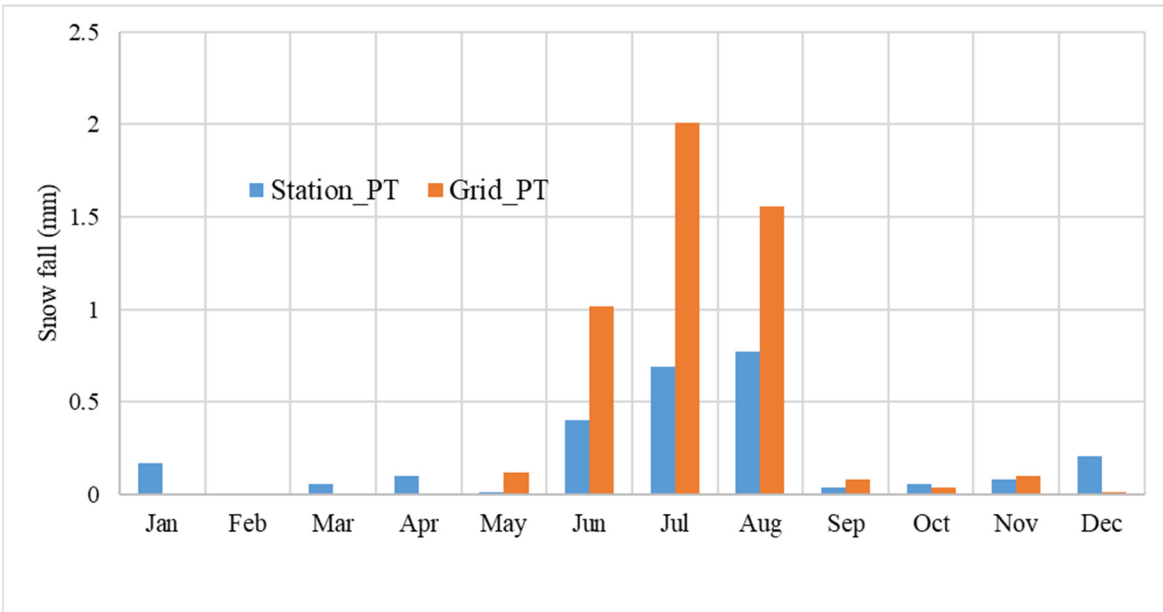

**Fig. S4.** Comparison of simulated monthly snow fall for the El Frayle watershed based on two weather datasets.
